# Supplementary material for: Molecular and in vivo phenotyping of missense variants of the human glucagon receptor
Source: PubMed Central journal article supplement (PMC8829087; doi:10.1016/j.jbc.2021.101413), 2021-11-19

**Supplementary Table 1 | gnomAD and literature found human missense variants in the glucagon receptor**

| Missense variant | Location | GnomAD MAF | Reference id | GnomAD Allele count | Number of homozygotes | Transcript Consequence |
|------------------|----------|------------|--------------|---------------------|-----------------------|------------------------|
| P2S              | ECD      | 7.2E-06    | rs1374465504 | 1                   | 0                     | c.4C>T                 |
| <b>P3S</b>       | ECD      | 7.2E-06    | rs746335439  | 1                   | 0                     | c.7C>T                 |
| P3T              | ECD      | 7.2E-06    | rs746335439  | 1                   | 0                     | c.7C>A                 |
| P3L              | ECD      | 7.2E-06    | rs1050897506 | 1                   | 0                     | c.8C>T                 |
| Q5P              | ECD      | 2.9E-05    | rs1271734930 | 4                   | 0                     | c.14A>C                |
| <b>R8Q</b>       | ECD      | 2.9E-05    | rs773994205  | 4                   | 0                     | c.23G>A                |
| P9L              | ECD      | 3.2E-05    | rs1233390237 | 1                   | 0                     | c.26C>T                |
| L13V             | ECD      | 7.4E-06    | rs924505906  | 1                   | 0                     | c.37T>G                |
| L17P             | ECD      | 2.9E-05    | rs953530197  | 5                   | 0                     | c.50T>C                |
| A18D             | ECD      | 1.2E-05    | rs1335228562 | 2                   | 0                     | c.53C>A                |
| C19W             | ECD      | 1.5E-05    | rs1054447666 | 2                   | 0                     | c.57C>G                |
| P24H             | ECD      | 7.1E-06    | rs1323911527 | 1                   | 0                     | c.71C>A                |
| <b>A26T</b>      | ECD      | 6.4E-05    | rs770131289  | 11                  | 0                     | c.76G>A                |
| <b>M29T</b>      | ECD      | 1.7E-05    | rs747611271  | 3                   | 0                     | c.86T>C                |
| D30H             | ECD      | 7.1E-06    | rs1263930997 | 1                   | 0                     | c.88G>C                |
| D30G             | ECD      | 7.1E-06    | rs1480166504 | 1                   | 0                     | c.89A>G                |
| <b>G40S</b>      | ECD      | 6.8E-03    | rs1801483    | 1170                | 5                     | c.118G>A               |
| G40A             | ECD      | 7.1E-06    | rs1158418305 | 1                   | 0                     | c.119G>C               |
| <b>D41E</b>      | ECD      | 1.4E-05    | rs760232106  | 2                   | 0                     | c.123C>A               |
| H45Y             | ECD      | 1.4E-05    | rs984272223  | 2                   | 0                     | c.133C>T               |
| S48N             | ECD      | 7.1E-06    | rs1364365831 | 1                   | 0                     | c.143G>A               |
| P52T             | ECD      | 7.1E-06    | rs1331669976 | 1                   | 0                     | c.154C>A               |
| P52S             | ECD      | 7.1E-06    | rs1331669976 | 1                   | 0                     | c.154C>T               |
| <b>T54M</b>      | ECD      | 1.5E-04    | rs373371585  | 21                  | 0                     | c.161C>T               |
| <b>R60T</b>      | ECD      | 7.0E-06    | rs561472081  | 1                   | 0                     | c.179G>C               |
| F62L             | ECD      | 7.0E-06    | rs1381720436 | 1                   | 0                     | c.184T>C               |
| <b>D63N</b>      | ECD      | 3.5E-05    | rs1219737977 | 5                   | 0                     | c.187G>A               |

|                         |     |         |              |     |   |          |
|-------------------------|-----|---------|--------------|-----|---|----------|
| D63A                    | ECD | 7.0E-06 | rs1283204989 | 1   | 0 | c.188A>C |
| P69L                    | ECD | 1.4E-05 | rs576194179  | 2   | 0 | c.206C>T |
| A73T                    | ECD | 4.6E-05 | rs868431560  | 8   | 0 | c.217G>A |
| <b>T76M</b>             | ECD | 1.3E-03 | rs189736697  | 232 | 1 | c.227C>T |
| I79V                    | ECD | 2.3E-05 | rs1038824634 | 4   | 0 | c.235A>G |
| P82S                    | ECD | 7.0E-06 | rs1378394827 | 1   | 0 | c.244C>T |
| <b>P86S<sup>a</sup></b> | ECD |         |              |     | 1 | c.256C>T |
| <b>H88N</b>             | ECD | 1.7E-05 | rs755602452  | 3   | 0 | c.262C>A |
| H93Q                    | ECD | 7.1E-06 | rs1222169977 | 1   | 0 | c.279C>A |
| R94C                    | ECD | 3.5E-05 | rs552010052  | 6   | 0 | c.280C>T |
| R94H                    | ECD | 1.4E-05 | rs1022912945 | 2   | 0 | c.281G>A |
| <b>V96E</b>             | ECD | 7.1E-06 | rs756454904  | 1   | 0 | c.287T>A |
| V96M                    | ECD | 2.1E-05 | rs1240225006 | 3   | 0 | c.286G>A |
| V96A                    | ECD | 7.1E-06 | rs756454904  | 1   | 0 | c.287T>C |
| K98R                    | ECD | 3.2E-05 | rs1253073377 | 1   | 0 | c.293A>G |
| R99S                    | ECD | 3.2E-05 | rs1193513499 | 1   | 0 | c.297A>T |
| G101R                   | ECD | 2.1E-05 | rs373865736  | 3   | 0 | c.301G>A |
| <b>D103N</b>            | ECD | 1.2E-04 | rs779580966  | 20  | 0 | c.307G>A |
| D103H                   | ECD | 3.2E-05 | rs779580966  | 1   | 0 | c.307G>C |
| G104S                   | ECD | 7.1E-06 | rs1377157654 | 1   | 0 | c.310G>A |
| R108H                   | ECD | 2.8E-05 | rs1312508282 | 4   | 0 | c.323G>A |
| P110S                   | ECD | 1.7E-05 | rs1043477675 | 3   | 0 | c.328C>T |
| P110H                   | ECD | 1.4E-05 | rs1228449257 | 2   | 0 | c.329C>A |
| <b>R111Q</b>            | ECD | 2.3E-05 | rs28522411   | 4   | 0 | c.332G>A |
| R111W                   | ECD | 1.7E-05 | rs1272192802 | 3   | 0 | c.331C>T |
| G112E                   | ECD | 2.9E-05 | rs1258411324 | 5   | 0 | c.335G>A |
| Q113R                   | ECD | 3.2E-05 | rs1372556587 | 1   | 0 | c.338A>G |
| <b>P114A</b>            | ECD | 1.2E-03 | rs5385       | 206 | 0 | c.340C>G |
| P114T                   | ECD | 7.1E-06 | rs5385       | 1   | 0 | c.340C>A |
| W115S                   | ECD | 7.1E-06 | rs1235960477 | 1   | 0 | c.344G>C |
| <b>R116H</b>            | ECD | 1.4E-05 | rs567794794  | 2   | 0 | c.347G>A |
| S119T                   | ECD | 6.4E-05 | rs1271662476 | 2   | 0 | c.355T>A |
| Q120R                   | ECD | 3.2E-05 | rs1305456353 | 1   | 0 | c.359A>G |

|              |      |         |              |    |   |          |
|--------------|------|---------|--------------|----|---|----------|
| <b>M123I</b> | ECD  | 2.8E-05 | rs780610679  | 4  | 0 | c.369G>A |
| D124E        | ECD  | 2.9E-05 | rs745508664  | 5  | 0 | c.372T>G |
| <b>G125C</b> | ECD  | 9.2E-05 | rs529078630  | 13 | 0 | c.373G>T |
| E126K        | ECD  | 2.8E-05 | rs889041091  | 4  | 0 | c.376G>A |
| <b>I128M</b> | ECD  | 9.8E-05 | rs181081681  | 17 | 0 | c.384T>G |
| V130F        | ECD  | 3.2E-05 | rs1008826316 | 1  | 0 | c.388G>T |
| <b>A135T</b> | TM1  | 1.7E-05 | rs573421080  | 3  | 0 | c.403G>A |
| M137I        | TM1  | 1.4E-05 | rs947568418  | 2  | 0 | c.411G>T |
| S140N        | TM1  | 7.1E-06 | rs754197868  | 1  | 0 | c.419G>A |
| F141L        | TM1  | 7.1E-06 | rs1478580187 | 1  | 0 | c.423C>A |
| V143A        | TM1  | 7.1E-06 | rs1157583633 | 1  | 0 | c.428T>C |
| Y145N        | TM1  | 3.2E-05 | rs1269119839 | 1  | 0 | c.433T>A |
| T146R        | TM1  | 7.1E-06 | rs1420954588 | 1  | 0 | c.437C>G |
| A155T        | TM1  | 7.1E-06 | rs755419233  | 1  | 0 | c.463G>A |
| <b>A159T</b> | TM1  | 2.9E-05 | rs758874938  | 5  | 0 | c.475G>A |
| G165S        | TM1  | 3.2E-05 | rs1222914520 | 1  | 0 | c.493G>A |
| L166R        | TM1  | 3.2E-05 | rs1241628118 | 1  | 0 | c.497T>G |
| S167R        | ICL1 | 2.8E-05 | rs969354907  | 4  | 0 | c.501C>G |
| T172I        | TM2  | 6.3E-05 | rs1276893614 | 11 | 0 | c.515C>T |
| R173C        | TM2  | 3.5E-05 | rs867133127  | 6  | 0 | c.517C>T |
| R173L        | TM2  | 1.4E-05 | rs867051527  | 2  | 0 | c.518G>T |
| R173H        | TM2  | 7.1E-06 | rs867051527  | 1  | 0 | c.518G>A |
| A175T        | TM2  | 7.1E-06 | rs1482107974 | 1  | 0 | c.523G>A |
| A178V        | TM2  | 5.8E-05 | rs571642081  | 10 | 0 | c.533C>T |
| A178T        | TM2  | 6.4E-05 | rs1487695265 | 2  | 0 | c.532G>A |
| N179T        | TM2  | 1.7E-05 | rs1027790160 | 3  | 0 | c.536A>C |
| N179D        | TM2  | 7.0E-06 | rs756243536  | 1  | 0 | c.535A>G |
| A182V        | TM2  | 1.4E-05 | rs550681728  | 2  | 0 | c.545C>T |
| K187E        | TM2  | 7.0E-06 | rs1399499869 | 1  | 0 | c.559A>G |
| S189I        | TM2  | 7.0E-06 | rs1296860048 | 1  | 0 | c.566G>T |
| V191M        | TM2  | 7.0E-06 | rs1044985218 | 1  | 0 | c.571G>A |
| T200I        | TM2  | 1.4E-05 | rs1234915081 | 2  | 0 | c.599C>T |
| T200A        | TM2  | 3.2E-05 | rs1310818080 | 1  | 0 | c.598A>G |

|              |      |         |              |    |   |          |
|--------------|------|---------|--------------|----|---|----------|
| T200S        | TM2  | 7.0E-06 | rs1310818080 | 1  | 0 | c.598A>T |
| R201H        | TM2  | 7.0E-06 | rs1213878850 | 1  | 0 | c.602G>A |
| Q204R        | ECL1 | 7.0E-06 | rs1488610176 | 1  | 0 | c.611A>G |
| Q204H        | ECL1 | 7.1E-06 | rs1190563230 | 1  | 0 | c.612G>T |
| Q204H        | ECL1 | 7.1E-06 | rs1190563230 | 1  | 0 | c.612G>C |
| K205N        | ECL1 | 7.1E-06 | rs1264921069 | 1  | 0 | c.615A>T |
| <b>I206T</b> | ECL1 | 2.1E-05 | rs1434718027 | 3  | 0 | c.617T>C |
| <b>D208N</b> | ECL1 | 1.4E-05 | rs1378474345 | 2  | 0 | c.622G>A |
| D208G        | ECL1 | 7.1E-06 | rs1419135924 | 1  | 0 | c.623A>G |
| <b>D209N</b> | ECL1 | 7.1E-06 | rs754634656  | 1  | 0 | c.625G>A |
| D209E        | ECL1 | 1.4E-05 | rs1401075459 | 2  | 0 | c.627C>A |
| L210F        | ECL1 | 7.1E-06 | rs1293495447 | 1  | 0 | c.628C>T |
| W215R        | ECL1 | 7.1E-06 | rs1301503565 | 1  | 0 | c.643T>C |
| L216F        | ECL1 | 7.1E-06 | rs1375779374 | 1  | 0 | c.646C>T |
| <b>A220V</b> | TM3  | 1.4E-05 | rs762346408  | 2  | 0 | c.659C>T |
| <b>V221L</b> | TM3  | 9.9E-05 | rs753414714  | 14 | 0 | c.661G>C |
| V221A        | TM3  | 7.1E-06 | rs1380723289 | 1  | 0 | c.662T>C |
| <b>R225H</b> | TM3  | 2.9E-04 | rs371217388  | 41 | 2 | c.674G>A |
| A228V        | TM3  | 2.9E-05 | rs758161776  | 5  | 0 | c.683C>T |
| A228T        | TM3  | 1.7E-05 | rs373598736  | 3  | 0 | c.682G>A |
| V229L        | TM3  | 6.9E-06 | rs561479377  | 1  | 0 | c.685G>C |
| V229G        | TM3  | 6.9E-06 | rs1423606565 | 1  | 0 | c.686T>G |
| M231V        | TM3  | 6.8E-06 | rs528738808  | 1  | 0 | c.691A>G |
| <b>V236M</b> | TM3  | 1.7E-04 | rs781413720  | 31 | 0 | c.706G>A |
| <b>Y239C</b> | TM3  | 2.0E-05 | rs1297475505 | 3  | 0 | c.716A>G |
| C240F        | TM3  | 2.0E-05 | rs975953807  | 3  | 0 | c.719G>T |
| V244A        | TM3  | 6.5E-06 | rs1276798780 | 1  | 0 | c.731T>C |
| L249V        | TM3  | 6.6E-06 | rs775595105  | 1  | 0 | c.745C>G |
| N251K        | TM3  | 3.9E-05 | rs749623311  | 7  | 0 | c.753C>A |
| N251I        | TM3  | 1.1E-05 | rs1242988043 | 2  | 0 | c.752A>T |
| N251S        | TM3  | 3.2E-05 | rs1242988043 | 1  | 0 | c.752A>G |
| G254R        | TM3  | 1.7E-05 | rs1358089389 | 3  | 0 | c.760G>C |
| L258P        | ICL2 | 7.0E-06 | rs1235094308 | 1  | 0 | c.773T>C |

|              |      |         |              |    |   |          |
|--------------|------|---------|--------------|----|---|----------|
| E260Q        | ICL2 | 7.0E-06 | rs999148337  | 1  | 0 | c.778G>C |
| E260K        | ICL2 | 7.0E-06 | rs999148337  | 1  | 0 | c.778G>A |
| S262R        | TM4  | 2.1E-05 | rs776062273  | 3  | 0 | c.786C>G |
| S262R        | TM4  | 7.0E-06 |              | 1  | 0 | c.784A>C |
| L266I        | TM4  | 7.0E-06 | rs1454402740 | 1  | 0 | c.796C>A |
| Y267C        | TM4  | 2.1E-05 | rs758992810  | 3  | 0 | c.800A>G |
| I270V        | TM4  | 2.9E-05 | rs1037221263 | 5  | 0 | c.808A>G |
| G271S        | TM4  | 1.4E-05 | rs995806123  | 2  | 0 | c.811G>A |
| G271A        | TM4  | 1.4E-05 | rs550972775  | 2  | 0 | c.812G>C |
| V279I        | TM4  | 3.2E-05 | rs1439311133 | 1  | 0 | c.835G>A |
| V280I        | TM4  | 1.0E-04 | rs548905669  | 18 | 0 | c.838G>A |
| V285I        | TM4  | 7.0E-06 | rs1218451512 | 1  | 0 | c.853G>A |
| C287Y        | TM4  | 4.6E-05 | rs781285550  | 8  | 0 | c.860G>A |
| E290K        | TM4  | 2.8E-04 | rs200674527  | 49 | 0 | c.868G>A |
| E290A        | TM4  | 1.2E-05 | rs1440223162 | 2  | 0 | c.869A>C |
| V292I        | ECL2 | 7.0E-06 | rs908475371  | 1  | 0 | c.874G>A |
| V292F        | ECL2 | 3.2E-05 | rs908475371  | 1  | 0 | c.874G>T |
| V292G        | ECL2 | 7.0E-06 | rs1168349939 | 1  | 0 | c.875T>G |
| S297N        | ECL2 | 7.1E-06 | rs575272671  | 1  | 0 | c.890G>A |
| <b>D299N</b> | ECL2 | 2.1E-05 | rs761720188  | 3  | 0 | c.895G>A |
| M301T        | ECL2 | 7.1E-06 | rs1214298781 | 1  | 0 | c.902T>C |
| <b>L307P</b> | TM5  | 4.6E-05 | rs373391581  | 8  | 0 | c.920T>C |
| <b>R308W</b> | TM5  | 8.7E-05 | rs1209087661 | 15 | 0 | c.922C>T |
| R308L        | TM5  | 7.1E-06 | rs1266924744 | 1  | 0 | c.923G>T |
| P310L        | TM5  | 7.1E-06 | rs1195738034 | 1  | 0 | c.929C>T |
| <b>V311I</b> | TM5  | 3.5E-05 | rs377519283  | 6  | 0 | c.931G>A |
| I315M        | TM5  | 1.4E-05 | rs1454621277 | 2  | 0 | c.945C>G |
| F319L        | TM5  | 2.8E-05 | rs774799702  | 4  | 0 | c.957C>A |
| F319Y        | TM5  | 3.2E-05 | rs1223567514 | 1  | 0 | c.956T>A |
| F320S        | TM5  | 1.7E-05 | rs1049700509 | 3  | 0 | c.959T>C |
| F322L        | TM5  | 2.5E-04 | rs762562348  | 44 | 0 | c.966C>G |
| F322L        | TM5  | 1.4E-05 | rs1256072758 | 2  | 0 | c.964T>C |
| V323I        | TM5  | 6.4E-05 | rs151274323  | 11 | 0 | c.967G>A |

|              |      |         |              |    |   |           |
|--------------|------|---------|--------------|----|---|-----------|
| R324C        | TM5  | 1.7E-05 | rs371422062  | 3  | 0 | c.970C>T  |
| R324H        | TM5  | 1.7E-05 | rs1172127702 | 3  | 0 | c.971G>A  |
| I325V        | TM5  | 3.2E-05 | rs1453657226 | 1  | 0 | c.973A>G  |
| V326I        | TM5  | 2.9E-05 | rs538739071  | 5  | 0 | c.976G>A  |
| L328Q        | TM5  | 7.1E-06 | rs1310958309 | 1  | 0 | c.983T>A  |
| L328P        | TM5  | 7.1E-06 | rs1310958309 | 1  | 0 | c.983T>C  |
| V330M        | TM5  | 3.2E-05 | rs371777245  | 1  | 0 | c.988G>A  |
| L333R        | TM5  | 7.1E-06 | rs1338189422 | 1  | 0 | c.998T>G  |
| R334Q        | TM5  | 3.5E-05 | rs922855912  | 6  | 0 | c.1001G>A |
| R334W        | TM5  | 1.7E-05 | rs976902380  | 3  | 0 | c.1000C>T |
| A335T        | TM5  | 3.2E-05 | rs954105221  | 1  | 0 | c.1003G>A |
| R336Q        | ICL3 | 4.7E-04 | rs531523452  | 66 | 2 | c.1007G>A |
| R336W        | ICL3 | 2.1E-05 | rs568466743  | 3  | 0 | c.1006C>T |
| H339R        | ICL3 | 7.1E-06 | rs1486905557 | 1  | 0 | c.1016A>G |
| T341A        | ICL3 | 7.1E-06 | rs936322272  | 1  | 0 | c.1021A>G |
| R346W        | TM6  | 9.2E-05 | rs766354711  | 13 | 0 | c.1036C>T |
| R346Q        | TM6  | 1.4E-05 | rs1419839154 | 2  | 0 | c.1037G>A |
| A348G        | TM6  | 7.1E-06 | rs1211413966 | 1  | 0 | c.1043C>G |
| T353A        | TM6  | 2.1E-05 | rs1361576793 | 3  | 0 | c.1057A>G |
| L358V        | TM6  | 5.8E-05 | rs748764343  | 10 | 0 | c.1072C>G |
| V360I        | TM6  | 7.1E-06 | rs978118361  | 1  | 0 | c.1078G>A |
| <b>E362K</b> | TM6  | 1.4E-05 | rs1441715310 | 2  | 0 | c.1084G>A |
| E362Q        | TM6  | 7.1E-06 | rs1441715310 | 1  | 0 | c.1084G>C |
| A366T        | TM6  | 1.2E-04 | rs370541643  | 17 | 0 | c.1096G>A |
| <b>V368M</b> | ECL3 | 7.1E-05 | rs771824180  | 10 | 1 | c.1102G>A |
| T369M        | ECL3 | 1.4E-05 | rs947813160  | 2  | 0 | c.1106C>T |
| E371K        | ECL3 | 7.1E-06 | rs1335016020 | 1  | 0 | c.1111G>A |
| A373T        | ECL3 | 1.7E-05 | rs1439063828 | 3  | 0 | c.1117G>A |
| A373S        | ECL3 | 7.1E-06 | rs1439063828 | 1  | 0 | c.1117G>T |
| A373V        | ECL3 | 7.1E-06 | rs1182403822 | 1  | 0 | c.1118C>T |
| G375S        | TM7  | 3.2E-05 | rs1313639238 | 1  | 0 | c.1123G>A |
| T376N        | TM7  | 2.3E-05 | rs372612289  | 4  | 0 | c.1127C>A |
| T376S        | TM7  | 7.1E-06 | rs372612289  | 1  | 0 | c.1127C>G |

|              |        |         |              |     |   |           |
|--------------|--------|---------|--------------|-----|---|-----------|
| <b>R378C</b> | TM7    | 1.7E-05 | rs1474100584 | 3   | 0 | c.1132C>T |
| R378H        | TM7    | 7.1E-06 | rs1166903170 | 1   | 0 | c.1133G>A |
| <b>A380T</b> | TM7    | 4.1E-05 | rs377211796  | 7   | 0 | c.1138G>A |
| D385N        | TM7    | 7.1E-06 | rs1355452290 | 1   | 0 | c.1153G>A |
| F391L        | TM7    | 5.7E-05 | rs752844034  | 8   | 0 | c.1173C>A |
| L395P        | TM7    | 4.9E-05 | rs1396277104 | 7   | 0 | c.1184T>C |
| V396E        | TM7    | 7.0E-06 | rs1287425806 | 1   | 0 | c.1187T>A |
| V398I        | TM7    | 2.1E-05 | rs747664695  | 3   | 0 | c.1192G>A |
| L399P        | TM7    | 3.2E-05 | rs1458636561 | 1   | 0 | c.1196T>C |
| V407M        | H8     | 7.3E-06 | rs1253368710 | 1   | 0 | c.1219G>A |
| S409W        | H8     | 4.7E-05 | rs527317042  | 8   | 0 | c.1226C>G |
| S409L        | H8     | 1.2E-05 | rs527317042  | 2   | 0 | c.1226C>T |
| S409P        | H8     | 7.2E-06 | rs1187609450 | 1   | 0 | c.1225T>C |
| R412L        | H8     | 1.2E-04 | rs775647518  | 20  | 0 | c.1235G>T |
| R412W        | H8     | 5.9E-05 | rs552133484  | 10  | 0 | c.1234C>T |
| R412Q        | H8     | 7.2E-06 | rs775647518  | 1   | 0 | c.1235G>A |
| R413W        | H8     | 5.0E-05 | rs757894502  | 7   | 0 | c.1237C>T |
| R413Q        | H8     | 7.2E-06 | rs887645895  | 1   | 0 | c.1238G>A |
| R414H        | H8     | 7.0E-04 | rs538504452  | 119 | 1 | c.1241G>A |
| H416R        | H8     | 4.3E-04 | rs137897678  | 74  | 1 | c.1247A>G |
| H416L        | H8     | 3.4E-04 | rs137897678  | 59  | 0 | c.1247A>T |
| H416Y        | H8     | 7.2E-06 | rs1357168725 | 1   | 0 | c.1246C>T |
| R417H        | H8     | 8.6E-05 | rs893269823  | 12  | 0 | c.1250G>A |
| R417C        | H8     | 1.8E-05 | rs1306988530 | 3   | 0 | c.1249C>T |
| R419S        | H8     | 9.3E-05 | rs558491682  | 13  | 0 | c.1255C>A |
| R419L        | H8     | 2.9E-05 | rs769673542  | 5   | 0 | c.1256G>T |
| R419H        | H8     | 2.3E-05 | rs769673542  | 4   | 0 | c.1256G>A |
| R419C        | H8     | 7.1E-06 | rs558491682  | 1   | 0 | c.1255C>T |
| V423L        | H8     | 3.2E-05 | rs1222479831 | 1   | 0 | c.1267G>C |
| L424P        | H8     | 3.2E-05 | rs1487455874 | 1   | 0 | c.1271T>C |
| R428Q        | H8     | 4.7E-04 | rs61734385   | 81  | 1 | c.1283G>A |
| R428W        | H8     | 1.2E-05 | rs1171829126 | 2   | 0 | c.1282C>T |
| T430I        | C-term | 7.1E-06 | rs1311017995 | 1   | 0 | c.1289C>T |

|       |        |         |              |     |   |           |
|-------|--------|---------|--------------|-----|---|-----------|
| H433P | C-term | 7.1E-06 | rs1377024369 | 1   | 0 | c.1298A>C |
| H433R | C-term | 7.1E-06 | rs1377024369 | 1   | 0 | c.1298A>G |
| S438L | C-term | 5.0E-04 | rs545914836  | 87  | 1 | c.1313C>T |
| G440S | C-term | 8.7E-05 | rs183571856  | 15  | 0 | c.1318G>A |
| G440R | C-term | 7.1E-06 | rs183571856  | 1   | 0 | c.1318G>C |
| G442S | C-term | 2.1E-05 | rs1021042497 | 3   | 0 | c.1324G>A |
| G442V | C-term | 7.1E-06 | rs188519815  | 1   | 0 | c.1325G>T |
| P443S | C-term | 1.4E-05 | rs1211330325 | 2   | 0 | c.1327C>T |
| E447K | C-term | 1.4E-05 | rs981152634  | 2   | 0 | c.1339G>A |
| E447D | C-term | 7.1E-06 | rs1187930393 | 1   | 0 | c.1341G>C |
| G451R | C-term | 7.1E-06 | rs1453320474 | 1   | 0 | c.1351G>A |
| R452K | C-term | 7.1E-06 | rs761153740  | 1   | 0 | c.1355G>A |
| G455V | C-term | 1.4E-05 | rs1414985683 | 2   | 0 | c.1364G>T |
| G455R | C-term | 7.1E-06 | rs1396876164 | 1   | 0 | c.1363G>C |
| S456T | C-term | 5.8E-05 | rs766891858  | 10  | 0 | c.1367G>C |
| Q457R | C-term | 1.7E-05 | rs754349828  | 3   | 0 | c.1370A>G |
| D458H | C-term | 2.3E-03 | rs138492107  | 405 | 1 | c.1372G>C |
| D458E | C-term | 7.1E-06 | rs1365987180 | 1   | 0 | c.1374T>G |
| A461V | C-term | 5.4E-04 | rs13306383   | 93  | 3 | c.1382C>T |
| T463I | C-term | 7.1E-06 | rs1220319020 | 1   | 0 | c.1388C>T |
| L469F | C-term | 2.8E-05 | rs780849172  | 4   | 0 | c.1405C>T |
| A473V | C-term | 2.3E-05 | rs975232367  | 4   | 0 | c.1418C>T |
| S475R | C-term | 3.2E-05 | rs1283696557 | 1   | 0 | c.1425C>A |
| P476L | C-term | 4.2E-05 | rs745618150  | 6   | 1 | c.1427C>T |

MAF is the minor allele frequency found in the gnomAD. a Literature (28). Selected residues for functional characterization are highlighted in bold.





|       |        |     |    |       |       |      |       |       |      |       |         |       |       |       |       |       |      |       |       |      |       |       |     |   |       |       |       |       |      |       |        |       |       |       |     |   |
|-------|--------|-----|----|-------|-------|------|-------|-------|------|-------|---------|-------|-------|-------|-------|-------|------|-------|-------|------|-------|-------|-----|---|-------|-------|-------|-------|------|-------|--------|-------|-------|-------|-----|---|
| A220V | -9.98  | 0.3 | 7  | 1,000 | 131.8 | 8    | 0.495 | 132.4 | 22   | 0.998 | 2.3     | 3     | -7.12 | 7     | 1,000 | 95.4  | 6    | 1,000 | 93.7  | 6.64 | 1,000 | 1.5   | 2   | 3 | -7.16 | 7     | 1,000 | 98.9  | 2.22 | >0.99 | 99     | 107.6 | 3.61  | 1,000 | 1.9 | 3 |
| V221L | -10.30 | 0.1 | 5  | 1,000 | 95.8  | 11.5 | 6     | 1,000 | 99.1 | 9     | >0.99   | 2.49  | 3     | -7.24 | 2     | 1,000 | 93.5 | 6.34  | 1,000 | 95.2 | 6.61  | 1,000 | 1.1 | 3 | 3     | -7.49 | 0     | 0.999 | 93.6 | 4     | 1,000  | 121.1 | 8.99  | 0.999 | 0.9 | 3 |
| R225H | -8.56  | 0.4 | 1  | 01    | 69.8  | 22.0 | 9     | 0.181 | 49.9 | 22    | 0.250   | 86.44 | 5     | -7.17 | 2     | 1,000 | 18.6 | 1.64  | 01    | 20.9 | 3.22  | 0.077 | 1.8 | 8 | 3     | -7.04 | 2     | 99    | 32.8 | 1.68  | 0.030  | 36.6  | 2.66  | 0.647 | 6.2 | 3 |
| V236M | -10.77 | 0.0 | 3  | 0.983 | 56.3  | 14.2 | 0     | 0.054 | 77.8 | 11    | 0.999   | 1.39  | 3     | -6.68 | 1     | 1,000 | 59.2 | 7.82  | 0.290 | 48.3 | 8.87  | 0.768 | 1.6 | 4 | 3     | -6.51 | 2     | 0.999 | 79.9 | 8.93  | 0.999  | 62.5  | 5.43  | 0.994 | 3.1 | 3 |
| Y239C | -10.51 | 0.0 | 9  | 0.999 | 84.6  | 2.88 | 0.999 | 98.5  | 4    | 99    | 2.48    | 3     | -5.91 | 0     | 0.994 | 49.8  | 6.69 | 0.056 | 31.6  | 5.25 | 0.242 | 3.1   | 8   | 3 | -6.42 | 4     | 0.999 | 67.6  | 6.45 | 0.969 | 51.7   | 4.10  | 0.966 | 3.9   | 3   |   |
| D299N | -9.72  | 0.1 | 2  | 0.999 | 106.9 | 8.99 | 1,000 | 89.6  | 11   | 1,000 | 1.43    | 3     | -7.28 | 4     | 1,000 | 100.3 | 9.68 | 99    | 106.7 | 9.24 | 1,000 | 1.2   | 6   | 3 | -7.70 | 3     | 0.999 | 131.9 | 6    | 0.974 | 169.2  | 9     | 0.471 | 1.2   | 3   |   |
| L307P | -10.77 | 1   | 1  | 0.984 | 88.2  | 6.00 | 0.999 | 103.2 | 3    | 1,000 | 1.37    | 3     | -6.46 | 0     | 0.999 | 98.6  | 3    | 99    | 75.9  | 0    | 0.999 | 1.2   | 6   | 3 | -6.82 | 5     | 1,000 | 96.3  | 1.10 | 1,000 | 82.7   | 3.71  | 1,000 | 1.6   | 3   |   |
| R308W | -7.39  | 1.1 | 5  | <0.00 | 42.2  | 11.6 | 4     | 0.001 | 16.7 | 10    | 0.018   | 9     | 3     | ND    | ND    | ND    | 9.6  | 3.92  | 01    | 18.6 | 5.89  | 0.058 | ND  | 3 | 3     | ND    | ND    | ND    | 2.1  | 1.29  | 01     | 3.9   | 3.00  | 0.043 | ND  | 3 |
| V311I | -9.29  | 0.1 | 9  | 0.503 | 106.9 | 8.33 | 1,000 | 71.6  | 8    | 0.999 | 4.72    | 3     | -6.61 | 9     | 1,000 | 90.7  | 6    | 1,000 | 76.4  | 9    | 0.999 | 6.2   | 3   | 3 | -7.04 | 1     | 99    | 123.2 | 0    | 0.999 | 125.14 | 4     | 0.999 | 5.4   | 3   |   |
| E362K | -9.48  | 1.6 | 4  | 0.906 | 67.0  | 5.81 | 0.417 | 48.2  | 6    | 0.636 | 27.55   | 3     | ND    | ND    | ND    | 6.9   | 1.31 | 01    | 6.2   | 4.99 | 0.012 | ND    | 3   | 3 | -5.28 | 1     | 0.250 | 14.3  | 3.58 | 0.001 | 5.74   | 3.18  | 0.053 | 3     | 3   |   |
| V368M | ND     | ND  | ND | ND    | 5.4   | 4.53 | 01    | 8.7   | 6    | 0.005 | 01      | 3     | -6.96 | 7     | 99    | 65.0  | 7.25 | 0.593 | 60.8  | 6.86 | 0.984 | 2.4   | 1   | 3 | -7.10 | 0     | 99    | 112.8 | 9    | 0.999 | 115.70 | 1     | 1,000 | 5.4   | 3   |   |
| R378C | -6.30  | 0.2 | 0  | 01    | 11.3  | 3.51 | 01    | 10.4  | 4    | 0.007 | 1.9E+07 | 3     | ND    | ND    | ND    | 4.1   | 2.37 | 01    | 5.5   | 5.17 | 0.010 | ND    | 3   | 3 | ND    | ND    | ND    | 0.6   | 0.61 | 01    | 6.15   | 3.18  | 0.055 | ND    | 3   |   |
| A380T | -10.03 | 0.2 | 6  | 1,000 | 100.6 | 16.6 | >0.99 | 101.8 | 22   | 99    | 1       | 6     | -7.18 | 1     | 1,000 | 91.2  | 3    | 1,000 | 91.5  | 8.59 | 1,000 | 1.4   | 9   | 3 | -7.50 | 6     | 0.999 | 126.1 | 6.75 | 0.994 | 156.39 | 9     | 0.839 | 2.4   | 3   |   |

All data were fitted with the three-parameter logistic curve to obtain EC50, Emax, and AUC. EC50 represent the negative logarithm of agonist concentration in molar that produces half the maximal response. Fmut signaling is the fold change of EC50 mutant divided by EC50 wildtype from the individual experiment. Emax is characterized as the maximal response at (10 nM for cAMP; 10  $\mu$ M for  $\beta$ -arrestin) normalized to the glucagon receptor wildtype's response. AUC is the integrated response of these two parameters EC50 and Emax. N.D. no EC50 detected in response to glucagon. Data represent the mean  $\pm$  s.e.m. of 33 (wildtype) or 3–6 (variants) independent experiments performed in duplicate for cAMP and 31 (wildtype) or 3–5 (variants) for  $\beta$ -arrestin1/2. Statistical significance between wildtype and variants Emax, EC50, and AUC was assessed using an ordinary one-way ANOVA test.

**Supplementary Table 3 | Binding characteristics of selected impaired activated missense variants**

| Missense variant       | $K_D$            | p-value | Fmut ( $K_D$ mutation/ $K_D$ wildtype) | $B_{max}$ (% of wildtype) | p-value | n  |
|------------------------|------------------|---------|----------------------------------------|---------------------------|---------|----|
| Wildtype               | $-7.47 \pm 0.08$ |         | 1.00                                   | $100 \pm$                 |         | 13 |
| M29 <sup>ECD</sup> T   | $-6.85 \pm 0.07$ | 0.004   | 5.17                                   | $71 \pm 14$               | 0.1192  | 4  |
| G40 <sup>ECD</sup> S   | $-7.29 \pm 0.10$ | 0.9949  | 1.12                                   | $120 \pm 3$               | 0.7609  | 3  |
| D63 <sup>ECD</sup> N   | $-8.50 \pm 0.19$ | <0.0001 | 0.16                                   | $0.2 \pm 0.1$             | <0.0001 | 4  |
| P86 <sup>ECD</sup> S   | $-7.59 \pm 0.21$ | 0.999   | 0.95                                   | $5 \pm 1.2$               | <0.0001 | 5  |
| H88 <sup>ECD</sup> N   | $-7.87 \pm 0.04$ | 0.3306  | 0.53                                   | $17 \pm 5$                | <0.0001 | 3  |
| V96 <sup>ECD</sup> E   | $-7.63 \pm 0.21$ | 0.9878  | 1.10                                   | $1.6 \pm 0.7$             | <0.0001 | 5  |
| R116 <sup>ECD</sup> H  | $-6.82 \pm 0.10$ | 0.0019  | 6.25                                   | $11 \pm 0.8$              | <0.0001 | 4  |
| G125 <sup>ECD</sup> C  | $-7.70 \pm 0.12$ | 0.9639  | 0.97                                   | $1.5 \pm 0.3$             | <0.0001 | 3  |
| A159 <sup>1-57</sup> T | $-7.98 \pm 0.11$ | 0.0798  | 0.39                                   | $7 \pm 0.8$               | <0.0001 | 3  |
| D209 <sup>ECL1</sup> N | $-7.50 \pm 0.18$ | 0.9999  | 1.39                                   | $27 \pm 13$               | <0.0001 | 3  |
| A220 <sup>3-25</sup> V | $-7.43 \pm 0.02$ | 0.9998  | 1.50                                   | $22 \pm 5$                | <0.0001 | 3  |
| V221 <sup>3-26</sup> L | $-7.20 \pm 0.07$ | 0.8948  | 1.39                                   | $152 \pm 19$              | 0.0006  | 3  |
| R225 <sup>3-30</sup> H | $-7.29 \pm 0.01$ | 0.9947  | 1.76                                   | $5 \pm 0.7$               | <0.0001 | 3  |
| V236 <sup>3-41</sup> M | $-7.81 \pm 0.09$ | 0.4822  | 0.83                                   | $63 \pm 27$               | 0.0129  | 4  |
| R308 <sup>5-40</sup> W | $-7.40 \pm 0.13$ | 0.9951  | 1.51                                   | $22 \pm 5$                | <0.0001 | 4  |
| V311 <sup>5-43</sup> I | $-7.02 \pm 0.12$ | 0.192   | 1.46                                   | $89 \pm 16$               | 0.9958  | 3  |
| E362 <sup>6-53</sup> K | $-6.48 \pm 0.03$ | <0.0001 | 12.72                                  | $76 \pm 13$               | 0.3047  | 4  |
| V368 <sup>6-59</sup> M | $-7.25 \pm 0.12$ | 0.9381  | 1.64                                   | $30 \pm 2$                | <0.0001 | 4  |
| R378 <sup>7-35</sup> C | $-7.76 \pm 0.09$ | 0.438   | 0.71                                   | $56 \pm 12$               | 0.0016  | 4  |

All data were fitted with the three-parameter logistic curve to obtain  $K_D$  and  $B_{max}$ .  $K_D$  represent the negative logarithm of the equilibrium dissociation constant of glucagon for the glucagon receptor wildtype or mutant. Fmut binding is the fold change of  $KD$  mutant divided by  $KD$  wildtype from the individual experiment.  $B_{max}$  is characterized as the maximal specific binding. Data represent the mean  $\pm$  s.e.m. of 13 (wildtype) or 3–5 (variants) independent experiments performed in duplicate. Statistical significance was assessed using an ordinary one-way ANOVA for  $K_D$  and  $B_{max}$  (\*P < 0.05; \*\*P < 0.01; as compared to wildtype response).

**Supplementary Table 4 | Primer sequences for the created missense variants in the glucagon receptor**

| Missense variant       | Forward primer                  | Reverse primer                  |
|------------------------|---------------------------------|---------------------------------|
| P3 <sup>ECD</sup> S    | ATGCCCTCCTGCCAGCCACAGCGACCCCTG  | CAGGGGTCGCTGTGGCTGGCAGGAGGGCAT  |
| R8 <sup>ECD</sup> Q    | GCCCCCTGCCAGCCACAGCAACCCCTGCTG  | CAGCAGGGGTTGCTGTGGCTGGCAGGGGGGC |
| A26 <sup>ECD</sup> T   | CACAGGTCCCCTCCACTCAGGTGATG      | CATCACCTGAGTGGAGGGGACCTGTG      |
| M29 <sup>ECD</sup> T   | CTCCGCTCAGGTGACGGACTTCTGTTTGAG  | CTCAAACAGGAAGTCCGTCACCTGAGCGGAG |
| G40 <sup>ECD</sup> S   | GTGGAAGCTTACTCTGACCAGTGTACCAC   | GTGGTGACACTGGTCAGAGTAGAGCTTCCAC |
| D41 <sup>ECD</sup> E   | GCTCTACGGTGAGCAGTGTACCACAACC    | GGTTGTGGTGACACTGCTACCCTAGAGC    |
| T54 <sup>ECD</sup> M   | CTGCCCTCCCATGGAGCTGGTGTGCAAC    | GTTGCACACCAGTCCATGGGAGGGGGCAG   |
| R60 <sup>ECD</sup> T   | CTCCCACGGAGCTGGTGTGCAACACAACC   | GGTTGTGTTGCACACCAGCTCCGTGGGAG   |
| D63 <sup>ECD</sup> N   | CCTTCAACAAGTATTCTGCTGGCCG       | CGCCAGCAGGAATACTTGTGAAGG        |
| T76 <sup>ECD</sup> M   | CACCCCGCCAATACCATGGCCAACATCTC   | GAGATGTTGGCCATGGTATTGGCGGGGGTG  |
| P86 <sup>ECD</sup> S   | CCTGCCCTGGTACCTGTCTTGGCACCAC    | GTGGTGCCAAGACAGGTACCAGGGGCAGG   |
| H88 <sup>ECD</sup> N   | CTGCCTTGAACCACAAAGTGCAACACCGC   | GCGGTGTTGACTTTGTGGTTCCAAGGCAG   |
| V96 <sup>ECD</sup> E   | GCAACACCGTTCGAGTTCAAGAGATGCGGG  | CCCGCATCTTGAACCTGAAGCGGTGTTGC   |
| D103 <sup>ECD</sup> N  | GTTCAAGAGATGCGGGCCCAACGGTCAGTG  | CACTGACCGTTGGGCCCGCATCTTGAAC    |
| R111 <sup>ECD</sup> Q  | GACCCAGGGGCAGCCTTGGCGTGATG      | CATCACGCCAAGGCTGCCCTGGGGTC      |
| P114 <sup>ECD</sup> A  | GGACCCCGGGGGCAGGCTTGGCGTGATGCC  | GGCATCACGCCAAGCCTGCCCCCGGGTCC   |
| R116 <sup>ECD</sup> H  | CCGGGGGCAGCCTTGGCATGATGCTCCAG   | CTGGGAGGCATCATGCCAAGGCTGCCCCCGG |
| M123 <sup>ECD</sup> I  | GCCAGATCGATGGCGAGGAGATTGAGGTCC  | GGACCTCAATCTCTCGCCATCGATCTGGC   |
| G125 <sup>ECD</sup> C  | GCCTCCAGTGCCAGATGGATTGCGAGGAG   | CTCTCGCAATCCATCTGGCACTGGGAGGC   |
| I128 <sup>ECD</sup> M  | GGCGAGGAGATGGAGGTCCAGAAGGAGGTG  | CACCTCCTTCTGGACCTCCATCTCCTCGCC  |
| A135 <sup>1.33</sup> T | GAAGGAGGTGACCAAGATGTACAGC       | GCTGTACATCTTGGTCACCTCCTTC       |
| A159 <sup>1.57</sup> T | CTGCTCCTCACCTTGCCATCCTGG        | CCAGGATGGCCAAGGTGAGGAGCAG       |
| I206 <sup>ECL1</sup> T | CAGAAAACCTGGCGACGACCTCAGTG      | CACTGAGGTCGTCGCCAGTTTTCTG       |
| D208 <sup>ECL1</sup> N | CCAGAAAATTGGCAACGACCTCAGTG      | CACTGAGGTCGTCGCCAATTTTCTGG      |
| D209 <sup>ECL1</sup> N | GAAAATTGGCGACAACCTCAGTGTACAGCAC | GTGCTGACACTGAGGTTGTCGCCAATTTTC  |
| A220 <sup>3.25</sup> V | CAGTGATGGAGTGGTGGCTGGCTGC       | GCAGCCAGCCACCACTCCATCACTG       |
| V221 <sup>3.26</sup> L | CACCTGGCTCAGTGATGGAGCGCTGGCTGG  | CCAGCCAGCGCTCCATCACTGAGCCAGGTG  |
| V236 <sup>3.41</sup> M | GGCATCATGGCCAACACTACTGCTGGC     | GCCAGCAGTAGTTGGCCATGATGCC       |
| Y239 <sup>3.44</sup> C | GTGGCCAACCTGCTGCTGGCTG          | CAGCCAGCAGCAGTTGGCCAC           |
| R225 <sup>3.30</sup> H | GAGCGGTGGCTGGCTGCCATGTGGCCGCGG  | CCGCGGCCACATGGCAGCCAGCCACCGCTC  |

|                        |                                |                                |
|------------------------|--------------------------------|--------------------------------|
| D299 <sup>ECL2</sup> N | GACCAGCAATAACAACATGGGCTTCTGGTG | CACCAGAAGCCCATGTTGTTATTGCTGGTC |
| L307 <sup>5.39</sup> P | CTTCTGGTGGATCCCGCGGTTCCCC      | GGGGAACCGCGGGATCCACCAGAAG      |
| R308 <sup>5.40</sup> W | GGTGGATCCTGTGGTTCCCCGTCTTC     | GGAAGACGGGAACCACAGGATCCACC     |
| V311 <sup>5.43</sup> I | CGGTTCCCATCTTCTGGCCATCCTGATC   | GATCAGGATGGCCAGGAAGATGGGGAACCG |
| E362 <sup>6.53</sup> K | CTCTGCTGGGCGTCCACAAAGTGGTC     | GACCACTTTGTGGACGCCAGCAGAG      |
| V368 <sup>6.59</sup> M | GTGGTCTTCGCCTTCATGACGGACGAGCAC | GTGCTCGTCCGTCATGAAGGCGAAGACCAC |
| R378 <sup>7.35</sup> C | CACCCTGTGCTCCGCCAAGCTCTTC      | GAAGAGCTTGGCGGAGCACAGGGTG      |
| A380 <sup>7.37</sup> T | CTGCGCTCCACCAAGCTCTTCTCGAC     | GTCGAAGAAGAGCTTGGTGGAGCGCAG    |

**Supplementary Figure 1 | dose-dependent DNA activation of V368<sup>6.59</sup>M**

Dose-dependent increase (5–20  $\mu$ g) of transfected wildtype and V368<sup>6.59</sup>M glucagon receptor DNA resulted in weak activation after stimulation with 10 nM glucagon (n=4). Statistical significance was assessed using a two-way ANOVA (\*\*P < 0.01; \*\*\*\*P < 0.0001 as compared to wildtype response).

# cAMP accumulation

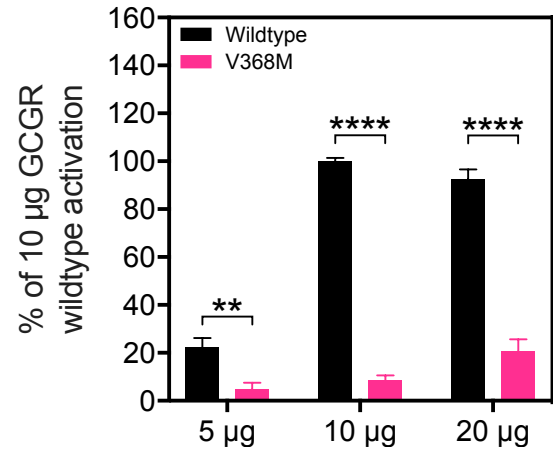

Supplement: mmc1.pdf [file mmc1.pdf]
